# **Title: Ecological memory of prior nutrient exposure in the human gut microbiome**

**Authors:** Jeffrey Letourneau<sup>1</sup>, Zachary C Holmes<sup>1</sup>, Eric P Dallow<sup>1</sup>, Heather K Durand<sup>1</sup>, Sharon Jiang<sup>1</sup>, Savita K Gupta<sup>1</sup>, Adam C Mincey<sup>2</sup>, Michael J Muehlbauer<sup>2</sup>, James R Bain<sup>2</sup>, Lawrence A  
5 David<sup>1,3,\*</sup>

## **Affiliations:**

<sup>1</sup>Department of Molecular Genetics and Microbiology, Duke University; Durham, NC, USA.

<sup>2</sup>Duke Molecular Physiology Institute, Duke University School of Medicine; Durham, NC,  
USA.

10 <sup>3</sup>Program in Computational Biology and Bioinformatics, Duke University; Durham, NC,  
USA.

\*Corresponding author. Email: [lawrence.david@duke.edu](mailto:lawrence.david@duke.edu).

**Abstract:** Many ecosystems retain an ecological memory of past conditions that affects  
15 responses to future stimuli. However, it remains unknown what mechanisms and dynamics may  
govern such a memory in microbial communities. Here, in both a human dietary intervention  
cohort and an artificial gut, we show that the human gut microbiome encodes a memory of past  
carbohydrate exposures. Changes in the relative abundance of primary degraders were sufficient  
to enhance metabolism, and these changes were mediated by transcriptional changes within  
20 hours of initial exposure. We further found that ecological memory of one carbohydrate species  
impacted metabolism of others. These findings demonstrate that the human gut microbiome's

metabolic potential reflects dietary exposures over preceding days and changes within hours of exposure to a novel nutrient.

**One Sentence Summary:** Recent nutrient exposures are encoded into the structure and activity of human gut microbial communities, which enables more efficient future metabolic responses.

5

## Main Text:

Ecological memory describes a broad range of phenomena in which past disturbances experienced by an ecosystem influence community responses in the present (1). Such responses may reflect prior abiotic experiences (e.g. past rain or fires shaping reproduction strategies in plants) or biotic ones (e.g. species extinction altering competitive phenotypes among extant organisms) (2). Knowing that ecosystems retain memory has helped shape frameworks for reintroducing locally extinct species and promoting species diversity in settings like hardwood forests (2, 3). Ecological memory may also amplify the severity of ecosystem damage caused by climate change (4).

Despite the power of ecological memory to understand and manage ecological dynamics, our knowledge of how this concept applies to microbial ecosystems remains sparse. Within individual microbial species, evidence exists for memory-like processes. Among bacterial monocultures, past environmental conditions like nutrient availability affects metabolic potential (5–7), or the ability to utilize a substrate of interest. Yet, at the microbial community level, our understanding of how past environmental conditions affect future ecosystem function is limited. It has been observed that lasting changes in the abundance of taxa result from disturbances like oil spills (8, 9), antibiotic administration (10), dietary oscillations (11), and infection (12). In the human gut microbiome, it has been demonstrated that infection<sup>13</sup> and obesogenic diet exposure<sup>12</sup> induce a memory that affects the ecological outcome of subsequent perturbations. Still, it is not yet known what independent role microbes play in this memory (i.e. in the absence of host factors), nor the mechanism and properties of this memory. Furthermore, the fastest time scales on which microbial communities form ecological memory remain undefined. Due to the reproductive rates

of bacteria, ecological memory may form in microbial ecosystems orders of magnitude faster than in communities of plants and animals (13).

Nutrient metabolism in the human gut provides an opportunity to test for ecological  
5 memory in a microbial community setting. Competition for nutrients in the gut is among the  
strongest microbial ecological forces (14) and host intake of nutrients varies on a daily basis (15).  
We thus reasoned that if the metabolic potential of the human gut microbiome reflects recent  
nutritional availability, newly introduced nutrients would be incompletely metabolized and require  
multiple exposures to be fully utilized by intestinal bacteria. To test this hypothesis, we enrolled  
10 40 participants in a randomized placebo-controlled dietary intervention study. Individuals in the  
Prebiotic group were fed 18 g/day of inulin (Fig. S1a-d), a nutrient that can be metabolized by the  
gut microbiome (16–18), but which is typically consumed by individuals at low amounts (1-4  
g/day) (19). We measured metabolic potential before and after inulin exposure using an *ex vivo*  
assay of the capacity for the fecal microbiome to degrade carbohydrates over the course of 24  
15 hours (20). We observed a significant increase in inulin degradation after participants in the  
prebiotic group consumed inulin for one day ( $p = 0.0282$ , mixed-effects GLM; Fig. 1a, Fig. S2a).  
This finding suggests that within 24 hours of exposure to a novel nutrient, the human gut  
microbiome enhances its metabolic potential for that nutrient.

20 To systematically examine how inulin exposure altered the metabolic potential of the  
human gut microbiome, we considered three primary facets of ecological memory: lag, duration,  
and strength (1). Lag refers to the amount of time after a disturbance before the event is translated  
into a differential response to future stimuli. To measure memory lag with greater resolution and  
control than possible among humans *in vivo*, we employed an “artificial gut” model of the distal

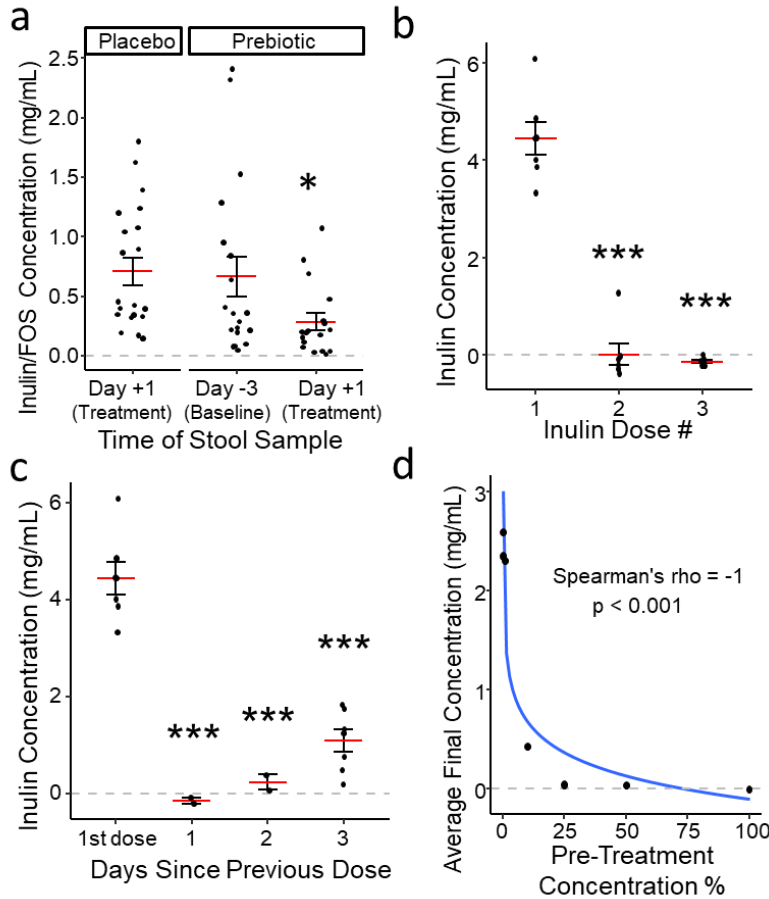

**Figure 1. Ecological memory**

**of prior nutrient exposure is encoded within 24 hours.**

**a**, Inulin/FOS concentrations after incubation of slurried stool samples with inulin for 24 hours *ex vivo*. ( $p = 0.0282$ , mixed-effects GLM;  $n = 21$  participants in Placebo group, 19 in Prebiotic group Baseline, 18 in Prebiotic group Treatment.) **b**, Concentration of inulin

remaining in each artificial gut vessel 6 hours after dosing. (Mixed-effects linear model with Dose 1 as intercept;  $n = 7$  artificial gut vessels.) **c**, Concentration of inulin remaining in each vessel after 6 hours by time since previous dose. (Mixed-effects linear model with 1<sup>st</sup> dose as intercept;  $n = 7, 2, 2,$  and  $7$  vessels, respectively. Setting the model intercept to 1 day shows a significant difference ( $p = 0.0475$ ) between 1 and 3 days.) **d**, Average final inulin concentration (of triplicate cultures) after 6 hours incubation on inulin, preceded by pre-treatment with an inulin dose of varying concentration. Log2 regression line plotted. **a-c**, Mean and standard error plotted. \*  $p < 0.05$ , \*\*  $p < 0.01$ , \*\*\*  $p < 0.001$ .

colon seeded with a fecal microbiome sample from a healthy human donor (Fig. S1e-f) (21, 22).

To measure lag, we dosed each artificial gut vessel with a single 2 g dose of inulin each day (Fig.

S1e). We measured differential responses to inulin supplementation by direct measurement of inulin concentration at -2 hr and +6 hr from each dose, as well as by continuous monitoring of pH, which decreases as inulin is metabolized (23) and impacts the overall ecology of the gut microbiome (24). These measurements revealed that by the second day of inulin treatment, gut microbial metabolism was altered; significantly less inulin remained in vessels at +6 hr on the second and third days of dosing ( $p < 0.001$ , mixed-effects linear model, Fig. 1b). Likewise, ecosystem pH reached a significantly lower minimum value on the second and subsequent days of dosing compared to the first ( $p < 0.001$ , mixed-effects linear model, Fig. S2b). Together, these findings suggest the gut microbiome can encode memory to a nutritional stimulus within a day of exposure.

We next investigated the duration and strength of microbiome memory. We added a second dosing week to our artificial gut model in which we varied the length between doses (Fig. S1e). Extending this period to two days between doses reduced, but did not entirely negate, the enhanced pH response (Fig. S2c). Microbiome potential to degrade inulin persisted even longer and remained enhanced when doses were separated by three days ( $p < 0.001$ , mixed-effects linear model; Fig. 1c). Still, our model suggested that inulin degradation capability had significantly decreased at 3 days between doses ( $p = 0.0175$ ). We then set up a high-throughput *in vitro* anaerobic batch culture system to measure how the strength of microbiome memory varies following a wide range of inulin exposures (25). We observed a negative dose-dependence between concentration of inulin pre-treatment and subsequent metabolic memory (Spearman correlation  $p < 0.001$ ; Fig. 1d, Fig. S2d). Notably, maximal inulin breakdown efficiency and acidification were reached below our original dose, which suggested that the gut microbiome's ability to be primed for inulin metabolism could be saturated.

Having observed changes in community-level metabolism, we employed a multi-omics approach to determine the extent to which repeated nutrient exposure impacted community composition and function. While none of the taxa analyzed by 16S rRNA sequencing were found to have changed in abundance following the first inulin exposure (Dose 1 Hr +6), forty-three (47%) had altered abundance following the second exposure (95% credible interval excluding zero, Bayesian multinomial logistic-normal model; Fig. 2a, Fig. S3). Similarly, RNA sequencing revealed that across the global transcriptome (i.e. the collective transcriptome of the whole community), only two gene groups, both glycoside hydrolases, were differentially expressed after the first inulin dose; following the second dose, 18 genes were differentially expressed ( $p < 0.05$ , ALDEx2 GLM with Benjamini-Hochberg correction; Fig. 2b). Analyzing transcriptional changes within taxa, we found that the initial set of differentially expressed transcripts was significantly enriched for carbohydrate metabolism and transport functions (COG category “G”;  $p = 0.00779$ , chi-squared test; Fig. S4g). Following Dose 2, there was a 2.6-fold change in the number of transcripts with expression changes ( $p < 0.05$ , ALDEx2 GLM with Benjamini-Hochberg correction), and an additional 19 taxa (a 50% increase) had at least one such transcript (Fig. S4d).

Metabolomic analyses further confirmed widespread alterations to microbial biochemical activity and environment following repeated nutrient exposure. Total short-chain fatty acid (SCFA) content was not significantly altered after the initial inulin dose, but was significantly increased after the second ( $p < 0.001$ , mixed-effects linear model; Fig. 2c), a trend which was driven by increases in acetate and butyrate (Fig. S5a). Since SCFA production is a major driver of acidification in the gut (26), these observations may explain the observed lag in

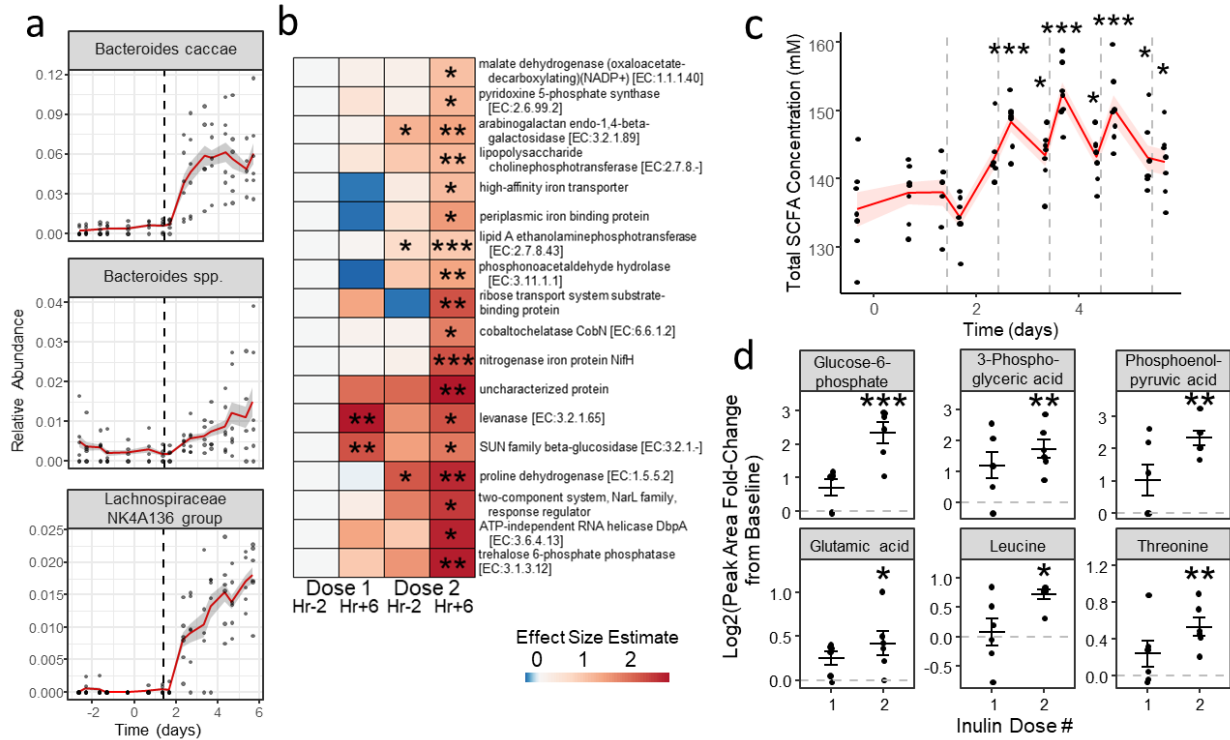

**Figure 2: Compositional and transcriptomic changes reflect nutritional memory.**

**a**, Select SVs found to be significantly increased with inulin treatment by 16S rDNA sequencing. (Multinomial logistic-normal model;  $n = 6$  vessels.) **b**, Heatmap of KEGG gene functions found to be differentially expressed by time point in the global transcriptome. Color scale denotes effect size from baseline value within each KEGG function. (ALDEx2 GLM significance from baseline shown;  $n = 5$  vessels.) **c**, Total SCFA concentration in artificial gut vessels over time. Vertical lines represent times of inulin dosing. (Mixed-effect linear model with Dose 1 Hr -2 (Day 1.42 on x-axis) as intercept;  $n = 7$  vessels.) **d**, Change in concentration of select metabolites relative to baseline. Top row: fructose metabolism intermediates. Bottom row: amino acids. (Mixed-effects linear model significance from baseline shown;  $n = 6$  vessels.) Mean and standard error plotted. \*  $p < 0.05$ , \*\*  $p < 0.01$ , \*\*\*  $p < 0.001$ .



pH decrease (Fig. S2b-d). Untargeted metabolomics revealed a 15.5-fold increase (2 to 31) in the number of metabolites whose levels changed after the second dose of inulin relative to the first ( $p < 0.05$ , mixed-effects linear model; Fig. 2d, Fig. S5b). Notably, the set of metabolites that increased after the second dose included fructose breakdown intermediates and five amino acids (5  $p < 0.05$ , mixed-effect linear model; Fig. 2d, Fig. S5b), which suggests a shift from proteolytic metabolism towards a more saccharolytic state (27, 28). More broadly, our multi-omic analyses point to significantly greater changes in microbiome composition and activity as being associated with repeated nutrient exposure.

10 We investigated the specific ecological shifts that could amplify microbiome responses to a second inulin dose. We did not observe evidence that extracellular secretions induced memory, as inulin metabolism among inulin-naïve cultures could not be enhanced by adding conditioned media from inulin-treated cultures (Fig. 3a). We also did not find that changes to overall cell density in culture was related to inulin metabolic rates (Fig. S6a-b). By contrast, we were able to positively associate community taxonomic changes with microbiome memory to inulin exposure. 15 Our 16S rRNA analysis of artificial gut communities in the two hours prior to the second inulin exposure revealed that 18 out of 92 analyzed SVs were significantly altered in abundance (95% credible interval excluding zero, Bayesian multinomial logistic-normal model; Fig. S3) relative to two hours prior to the first dose. These SVs included *Bacteroides caccae*, a known primary degrader of inulin (Virtual Metabolic Human (VMH)) (29), as well as *Bacteroides spp.* and *Bifidobacterium spp.*, two genera that contain inulin-degrading species, and taxa such as *Lachnospiraceae NK4A136 group* previously shown to be associated with intestinal SCFA levels (30) (Fig. 2a). Adding a *B. caccae* isolate derived from our artificial gut community to inulin-naïve stool-derived mixed community cultures was sufficient to enhance inulin metabolism (Fig. 20

2b), supporting the hypothesis that changes to taxonomic composition alone may drive memory in microbial communities.

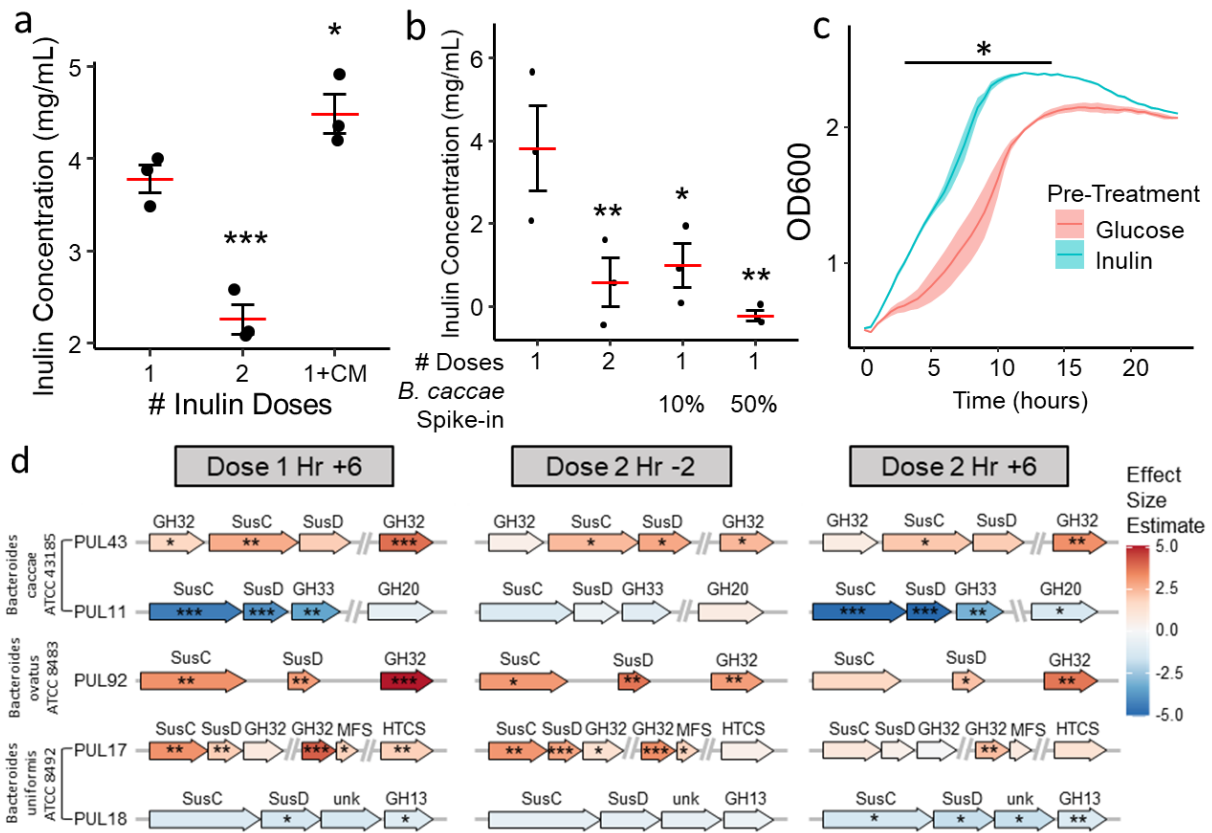

**Figure 3: *Bacteroides* PUL activation precedes broader transcriptional and compositional changes.**

**a**, Conditioned media from inulin-exposed cultures did not increase metabolism of inulin in treatment-naïve cultures. (Linear model;  $n = 3$  cultures). **b**, Effects of 10 or 50% *B. caccae* addition to complex community cultures. (Linear model;  $n = 3$  cultures). **c**, Effects of glucose or inulin pre-treatment on growth curves of *B. caccae* monocultures grown on inulin in conditioned media (from inulin-naïve cultures). (Linear model; interaction term of time and pre-treatment  $p < 0.05$  for all points below the line;  $n = 3$  cultures). **a-c**, Mean and standard error shown. **d**, Activation and repression of select PULs in *Bacteroides* by time point. (ALDEx2 GLM;  $n = 5$  artificial gut vessels). NS  $p > 0.05$ , \*  $p < 0.05$ , \*\*  $p < 0.01$ , \*\*\*  $p < 0.001$ .

Given the known role of polysaccharide utilization loci (31) (PULs) in carbohydrate sensing among individual gut microbes (32), we also expected to observe changes among select microbes after initial exposure to inulin in our artificial gut. Indeed, we found activation/repression of PULs in twelve *Bacteroides* taxa in the hours preceding the second inulin dose (Fig. S7). Since our analysis normalized expression levels within taxa, these differences reflected changes in the expression of genes within a given genome and not simply changes in bacterial taxonomic abundance. These PULs included genes encoding inulin-degradative glycoside hydrolase family 32 (GH32) enzymes, which were also upregulated in the global transcriptome after a second inulin dose (Fig. 2b), as well as transcriptionally linked SusC/SusD homologs, which work together to bind and import oligosaccharides (32) (Fig. 3d, Fig. S7). Given, however, that these PULs were activated even earlier, at Dose 1 Hr +6 (Fig. 3d, Fig. S7), we suspected that transcriptional changes played a role in enabling growth on the new substrate. In support of this hypothesis, we found that even after controlling for starting cell density, inulin pre-treatment enhanced the ability of *B. caccae* to grow on inulin (Fig. 3c, Fig. S6c). We therefore suspect that patterns of transcriptional change observed when monocultures of bacteria leave lag phase during diauxic shifts (33) are likely to also occur among *Bacteroides* species in a mixed species setting.

We also identified upregulated sets of syntenic genes outside of the *Bacteroides*, identifying several putative carbohydrate-associated loci ( $p < 0.05$ , ALDEx2 GLM with Benjamini-Hochberg correction; Fig. S4e) in taxa that degrade products of inulin hydrolysis (glucose, fructose, sucrose, or short-chain fructo-oligosaccharides (scFOS)) (29). Seven *Bacteroides* and two *Clostridium* species had loci with at least one gene still significantly

upregulated two hours prior to the second prebiotic dose (Figs. S4e, 6d). Three of these *Bacteroides* taxa maintained activation of genes encoding inulin degrading enzymes, and *B. caccae* also continued to upregulate a fructokinase gene ( $p < 0.05$ , ALDEx2 GLM with Benjamini-Hochberg correction; Fig. S6d). This genetic activity, coupled with enhanced degradation of inulin (Fig. 1b),  
5 may have enabled additional taxa to upregulate genes involved in pathways downstream of inulin processing (34) (Fig. 3b) and increase SCFA production (Fig. 2c, Fig. S5a). Our metagenomic and metabolomic data suggest that sustained expression of GH32 enzymes, along with increased relative abundance of the taxa that produce them (Fig. 2a), prime microbial communities for a more widespread metabolic response to inulin upon re-exposure.

10  
Given that expression of a particular PUL or growth of a certain taxon may be activated by multiple substrates (29, 35), we reasoned that ecological memory of inulin may trigger, or be triggered by, ecological memory of related carbohydrate compounds. We found evidence for this model in our human dietary intervention study. Participants' total baseline dietary fiber intake, as  
15 estimated by Diet History Questionnaire III (DHQ3), was negatively correlated with fecal inulin/FOS content in donor stool one day after the start of treatment in the Prebiotic group ( $p = 0.0232$ , Spearman correlation; Fig. 4a) but not the Placebo group ( $p = 0.402$ , Spearman correlation; Fig. S8d). Thus, participants who naturally consumed a high rate of dietary fiber tended to excrete less undigested inulin than individuals with low habitual fiber consumption.

20

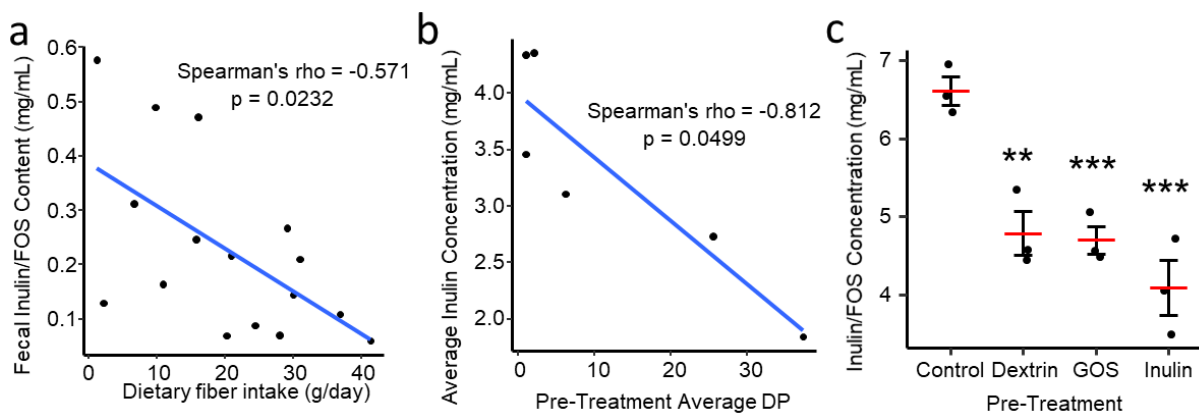

**Figure 4: Ecological memory is cross-reactive.**

**a**, Correlation between participant baseline dietary fiber (DHQ3) intake and fecal inulin/FOS content on Treatment Day +1 in the Prebiotic group. (n = 16 participants.) **b**, Correlation between average DP of pre-treatment inulin or inulin constituent and average final inulin concentration (or triplicate cultures). **c**, Final inulin concentration after pre-treatment with different prebiotics. (Linear model with control as intercept; n = 3 cultures.) Mean and standard error plotted. \* p < 0.05, \*\* p < 0.01, \*\*\* p < 0.001.

Next, we tested for the cross-reactivity of ecological memory to inulin degradation using *in vitro* models. We treated human gut microbiome cultures with the constituent components of inulin (fructose, glucose, sucrose, and FOS/inulin of various chain lengths). This treatment indeed enhanced subsequent inulin metabolism to varying degrees (p < 0.05, linear model; Fig. S8b-c). The magnitude of this effect was correlated with component chain length (Spearman correlation, p = 0.0499; Fig. 4b). We next tested whether treatment with non-fructan polysaccharides could enhance inulin metabolic rates. We found exposure to galacto-oligosaccharides (GOS) and dextrin resulted in partial, significant increases in inulin degradation capacity (p < 0.01, linear model; Fig. 4c) and significant decreases in culture pH relative to control following inulin treatment (p < 0.001, linear model; Fig. S8a). Community analysis of microbiome cultures revealed that non-inulin

treatment effects on the abundance of a specific bacterial taxon, *Clostridium ramosum*, were correlated with subsequent inulin response ( $p < 0.0130$ , Spearman correlation; Fig. S9a). *C. ramosum* is a known degrader of scFOS, as well as the component mono- and di-saccharides of GOS and dextrin, respectively (29). This correlation therefore supports a model where ecological memory within microbiome can exhibit cross-reactive properties in which altering the abundance of a nutrient-degrading microbial species ultimately impacts the rates at which related nutrients will subsequently be metabolized.

In concert, our findings demonstrate the existence of ecological memory of past nutrient exposure in the human gut microbiome. Previously, functional changes in the gut microbiome have generally been thought to take days to weeks to change (16), with evidence of transcriptomic changes within an individual's gut microbiome on the order of days (36). Our findings suggest ecological memory can be encoded even more rapidly, on sub-daily time scales for the human gut microbiome. This response time is consistent with how quickly individual microbes are known to undergo diauxic shifts, which also occur on the order of hours (37). Indeed, it is likely that selective pressures for rapid microbial metabolic change exist in environments like the mammalian gut, where community members replicate on hourly timescales and nutrient availability varies in both stochastic and rhythmic manners within a single day (38). Such adaptation may also benefit hosts by providing them with an adaptative microbial response to dietary shifts (36). Yet, given the benefits to rapid metabolic plasticity, it is perhaps surprising that we also observe evidence that after a nutrient is withdrawn, ecological memory persists for days and therefore likely across multiple generations of bacteria. Bacterial communities or their members may benefit from “bet hedging” strategies that balance the odds that a withdrawn nutrient is reintroduced (33). It is also

possible that once the transcriptional, compositional, and metabolomic landscape of a microbial community has been altered, restoring to an original starting state will encounter delay (39).

Our finding of ecological memory in human gut microbial systems also suggests avenues  
5 for the rational design of treatments that alter how the gut microbiome harvests energy (40) or  
metabolizes drugs (41, 42). To date, individualized therapies have accounted for inter-individual  
variation in microbiome composition and function (43), which have been linked to fixed  
population differences in both overall diversity and specific taxonomic differences (44). Yet, if the  
metabolic potential of the gut microbiome is plastic, observed microbiome heterogeneity may also  
10 reflect recent *intra*-individual variation in behavior or lifestyle. Rationally designed therapies may  
therefore benefit from monitoring changes to, and even manipulating, microbiome metabolic  
potential over time (45). For example, our work suggests that microbiome-targeting nutritional  
interventions have the most potential to impact the microbial metabolism of individuals who are  
normally deficient in that nutrient's intake (Fig. 4a). Moreover, our finding that microbiome  
15 memory does not persist indefinitely suggests that such interventions will require repeated  
administration to sustain their microbial ecological impact.

## References:

1. K. Ogle, J. J. Barber, G. A. Barron-Gafford, L. P. Bentley, J. M. Young, T. E. Huxman,  
20 M. E. Loik, D. T. Tissue, Quantifying ecological memory in plant and ecosystem  
processes. *Ecol. Lett.* (2015), doi:10.1111/ele.12399.
2. A. H. Schweiger, I. Boulangeat, T. Conradi, M. Davis, J. C. Svenning, The importance of  
ecological memory for trophic rewilding as an ecosystem restoration approach. *Biol. Rev.*

(2019), doi:10.1111/brv.12432.

3. C. R. Webster, Y. L. Dickinson, J. I. Burton, L. E. Frelich, M. A. Jenkins, C. C. Kern, P. Raymond, M. R. Saunders, M. B. Walters, J. L. Willis, Promoting and maintaining diversity in contemporary hardwood forests: Confronting contemporary drivers of change and the loss of ecological memory. *For. Ecol. Manage.* (2018), ,  
5 doi:10.1016/j.foreco.2018.01.010.

4. T. P. Hughes, J. T. Kerry, S. R. Connolly, A. H. Baird, C. M. Eakin, S. F. Heron, A. S. Hoey, M. O. Hoogenboom, M. Jacobson, G. Liu, M. S. Pratchett, W. Skirving, G. Torda, Ecological memory modifies the cumulative impact of recurrent climate extremes. *Nat. Clim. Chang.* (2019), , doi:10.1038/s41558-018-0351-2.  
10

5. S. R. Stockwell, C. R. Landry, S. A. Rifkin, The yeast galactose network as a quantitative model for cellular memory. *Mol. Biosyst.* (2015), , doi:10.1039/c4mb00448e.

6. D. M. Wolf, L. Fontaine-Bodin, I. Bischofs, G. Price, J. Keasling, A. P. Arkin, Memory in microbes: Quantifying history-dependent behavior in a bacterium. *PLoS One* (2008),  
15 doi:10.1371/journal.pone.0001700.

7. P. Lyon, The cognitive cell: Bacterial behavior reconsidered. *Front. Microbiol.* (2015), , doi:10.3389/fmicb.2015.00264.

8. M. B. Smith, A. M. Rocha, C. S. Smillie, S. W. Olesen, C. Paradis, L. Wu, J. H. Campbell, J. L. Fortney, T. L. Mehlhorn, K. A. Lowe, J. E. Earles, J. Phillips, S. M. Techtmann, D. C. Joyner, D. A. Elias, K. L. Bailey, R. A. Hurt, S. P. Preheim, M. C. Sanders, J. Yang, M. A. Mueller, S. Brooks, D. B. Watson, P. Zhang, Z. He, E. A. Dubinsky, P. D. Adams, A. P. Arkin, M. W. Fields, J. Zhou, E. J. Alm, T. C. Hazen, Natural bacterial communities serve as quantitative geochemical biosensors. *MBio* (2015),  
20



doi:10.1128/mBio.00326-15.

9. M. C. Cordeiro, G. D. Garcia, A. M. Rocha, D. A. Tschoeke, M. E. Campeão, L. R. Appolinario, A. C. Soares, L. Leomil, A. Froes, L. Bahiense, C. E. Rezende, M. G. de Almeida, T. P. Rangel, B. C. V. De Oliveira, D. Q. R. de Almeida, M. C. Thompson, C. Thompson, F. L. Thompson, Insights on the freshwater microbiomes metabolic changes associated with the world's largest mining disaster. *Sci. Total Environ.* (2019), doi:10.1016/j.scitotenv.2018.11.112.
10. S. P. Kuster, W. Rudnick, A. Shigayeva, K. Green, M. Baqi, W. L. Gold, R. Lovinsky, M. P. Muller, J. E. Powis, N. Rau, A. E. Simor, S. L. Walmsley, D. E. Low, A. McGeer, S. Allard, I. Armstrong, B. Yaffe, D. Richardson, D. K. Chen, S. Deeks, J. Gubbay, F. Jamieson, H. R. Devlin, E. De Villa, K. Dooling, H. Dick, J. Downey, J. Kapala, K. Katz, I. Kitai, J. Johnstone, S. F. Kraiden, K. S. Lee, M. Loeb, F. Smaill, M. Lovgren, D. Rose, C. Ma, A. Plevneshi, B. Willey, S. Pong-Porter, K. Wong, I. Martin, A. G. Matlow, S. Richardson, D. Tran, S. O Grady, K. Ostrowska, A. Sarabia, J. Rodgers, V. Sales, P. Shokry, M. Silverman, M. Vearncombe, D. Yama-Mura, Previous antibiotic exposure and antimicrobial resistance in invasive pneumococcal disease: Results from prospective surveillance. *Clin. Infect. Dis.* (2014), doi:10.1093/cid/ciu497.
11. R. N. Carmody, G. K. Gerber, J. M. Luevano, D. M. Gatti, L. Somes, K. L. Svenson, P. J. Turnbaugh, Diet dominates host genotype in shaping the murine gut microbiota. *Cell Host Microbe* (2015), doi:10.1016/j.chom.2014.11.010.
12. A. Stacy, V. Andrade-Oliveira, J. A. McCulloch, B. Hild, J. H. Oh, P. J. Perez-Chaparro, C. K. Sim, A. I. Lim, V. M. Link, M. Enamorado, G. Trinchieri, J. A. Segre, B. Rehermann, Y. Belkaid, Infection trains the host for microbiota-enhanced resistance to

pathogens. *Cell* (2021), doi:10.1016/j.cell.2020.12.011.

13. L. A. David, A. Weil, E. T. Ryan, S. B. Calderwood, J. B. Harris, F. Chowdhury, Y. Begum, F. Qadri, R. C. LaRocque, P. J. Turnbaugh, Gut microbial succession follows acute secretory diarrhea in humans. *MBio* (2015), doi:10.1128/mBio.00381-15.
- 5 14. A. T. Reese, F. C. Pereira, A. Schintlmeister, D. Berry, M. Wagner, L. P. Hale, A. Wu, S. Jiang, H. K. Durand, X. Zhou, R. T. Premont, A. M. Diehl, T. M. O'Connell, S. C. Alberts, T. R. Kartzinel, R. M. Pringle, R. R. Dunn, J. P. Wright, L. A. David, Microbial nitrogen limitation in the mammalian large intestine. *Nat. Microbiol.* (2018), doi:10.1038/s41564-018-0267-7.
- 10 15. A. J. Johnson, P. Vangay, G. A. Al-Ghalith, B. M. Hillmann, T. L. Ward, R. R. Shields-Cutler, A. D. Kim, A. K. Shmagel, A. N. Syed, J. Walter, R. Menon, K. Koecher, D. Knights, Daily Sampling Reveals Personalized Diet-Microbiome Associations in Humans. *Cell Host Microbe* (2019), doi:10.1016/j.chom.2019.05.005.
- 15 16. T. Van De Wiele, N. Boon, S. Possemiers, H. Jacobs, W. Verstraete, Prebiotic effects of chicory inulin in the simulator of the human intestinal microbial ecosystem. *FEMS Microbiol. Ecol.* (2004), doi:10.1016/j.femsec.2004.07.014.
17. J. Tarini, T. M. S. Wolever, The fermentable fibre inulin increases postprandial serum short-chain fatty acids and reduces free-fatty acids and ghrelin in healthy subjects. *Appl. Physiol. Nutr. Metab.* (2010), doi:10.1139/H09-119.
- 20 18. R. Esquivel-Elizondo, S and Ilhan, ZE and Garcia-Peña, EI and Krajmalnik-Brown, Insights into butyrate production in a controlled fermentation system via gene predictions. *mSystems.* **2** (2017).

19. J. Van Loo, P. Coussement, L. De Leenheer, H. Hoebreg, G. Smits, On the Presence of Inulin and Oligofructose as Natural Ingredients in the Western Diet. *Crit. Rev. Food Sci. Nutr.* (1995), doi:10.1080/10408399509527714.
20. Z. C. Holmes, J. D. Silverman, H. K. Dressman, Z. Wei, E. P. Dallow, S. C. Armstrong, P. C. Seed, J. F. Rawls, L. A. David, Short-chain fatty acid production by gut microbiota from children with obesity differs according to prebiotic choice and bacterial community composition. *MBio* (2020), doi:10.1128/mBio.00914-20.
21. A. T. Reese, E. H. Cho, B. Klitzman, S. P. Nichols, N. A. Wisniewski, M. M. Villa, H. K. Durand, S. Jiang, F. S. Midani, S. N. Nimmagadda, T. M. O'connell, J. P. Wright, M. A. Deshusses, L. A. David, Antibiotic-induced changes in the microbiota disrupt redox dynamics in the gut. *Elife* (2018), doi:10.7554/eLife.35987.
22. J. D. Silverman, H. K. Durand, R. J. Bloom, S. Mukherjee, L. A. David, Dynamic linear models guide design and analysis of microbiota studies within artificial human guts. *Microbiome* (2018), doi:10.1186/s40168-018-0584-3.
23. G. T. Macfarlane, G. R. Gibson, J. H. Cummings, Comparison of fermentation reactions in different regions of the human colon. *J. Appl. Bacteriol.* (1992), doi:10.1111/j.1365-2672.1992.tb05187.x.
24. G. den Besten, K. van Eunen, A. K. Groen, K. Venema, D.-J. Reijngoud, B. M. Bakker, The role of short-chain fatty acids in the interplay between diet, gut microbiota, and host energy metabolism. *J. Lipid Res.* (2013), doi:10.1194/jlr.R036012.
25. N. Reichardt, M. Vollmer, G. Holtrop, F. M. Farquharson, D. Wefers, M. Bunzel, S. H. Duncan, J. E. Drew, L. M. Williams, G. Milligan, T. Preston, D. Morrison, H. J. Flint, P. Louis, Specific substrate-driven changes in human faecal microbiota composition contrast

with functional redundancy in short-chain fatty acid production. *ISME J.* (2018),  
doi:10.1038/ismej.2017.196.

26. J. M. W. Wong, R. De Souza, C. W. C. Kendall, A. Emam, D. J. A. Jenkins, in *Journal of Clinical Gastroenterology* (2006).
- 5 27. T. Van De Wiele, N. Boon, S. Possemiers, H. Jacobs, W. Verstraete, Inulin-type fructans of longer degree of polymerization exert more pronounced in vitro prebiotic effects. *J. Appl. Microbiol.* (2007), doi:10.1111/j.1365-2672.2006.03084.x.
28. M. Aguirre, A. Eck, M. E. Koenen, P. H. M. Savelkoul, A. E. Budding, K. Venema, Diet drives quick changes in the metabolic activity and composition of human gut microbiota  
10 in a validated in vitro gut model. *Res. Microbiol.* (2016),  
doi:10.1016/j.resmic.2015.09.006.
29. A. Noronha, J. Modamio, Y. Jarosz, E. Guerard, N. Sompairac, G. Preciat, A. D. Daniélsdóttir, M. Krecke, D. Merten, H. S. Haraldsdóttir, A. Heinken, L. Heirendt, S. Magnúsdóttir, D. A. Ravcheev, S. Sahoo, P. Gawron, L. Friscioni, B. Garcia, M.  
15 Prendergast, A. Puente, M. Rodrigues, A. Roy, M. Rouquaya, L. Wiltgen, A. Žagare, E. John, M. Krueger, I. Kuperstein, A. Zinovyev, R. Schneider, R. M. T. Fleming, I. Thiele, The Virtual Metabolic Human database: Integrating human and gut microbiome metabolism with nutrition and disease. *Nucleic Acids Res.* (2019),  
doi:10.1093/nar/gky992.
- 20 30. H. Li, F. Liu, J. Lu, J. Shi, J. Guan, F. Yan, B. Li, G. Huo, Probiotic Mixture of *Lactobacillus plantarum* Strains Improves Lipid Metabolism and Gut Microbiota Structure in High Fat Diet-Fed Mice. *Front. Microbiol.* (2020), doi:10.3389/fmicb.2020.00512.
31. N. Terrapon, V. Lombard, É. Drula, P. Lapébie, S. Al-Masaudi, H. J. Gilbert, B.

Henrissat, PULDB: The expanded database of Polysaccharide Utilization Loci. *Nucleic Acids Res.* (2018), doi:10.1093/nar/gkx1022.

32. D. N. Bolam, B. van den Berg, TonB-dependent transport by the gut microbiota: novel aspects of an old problem. *Curr. Opin. Struct. Biol.* (2018), ,  
5 doi:10.1016/j.sbi.2018.03.001.

33. A. Solopova, J. Van Gestel, F. J. Weissing, H. Bachmann, B. Teusink, J. Kok, O. P. Kuipers, Bet-hedging during bacterial diauxic shift. *Proc. Natl. Acad. Sci. U. S. A.* (2014),  
doi:10.1073/pnas.1320063111.

34. S. H. Duncan, G. Holtrop, G. E. Lobley, A. G. Calder, C. S. Stewart, H. J. Flint,  
10 Contribution of acetate to butyrate formation by human faecal bacteria. *Br. J. Nutr.*  
(2004), doi:10.1079/BJN20041150.

35. E. D. Sonnenburg, H. Zheng, P. Joglekar, S. K. Higginbottom, S. J. Firkbank, D. N. Bolam,  
J. L. Sonnenburg, Specificity of polysaccharide use in intestinal bacteroides species  
determines diet-induced microbiota alterations. *Cell* (2010),  
15 doi:10.1016/j.cell.2010.05.005.

36. L. A. David, C. F. Maurice, R. N. Carmody, D. B. Gootenberg, J. E. Button, B. E. Wolfe,  
A. V. Ling, A. S. Devlin, Y. Varma, M. A. Fischbach, S. B. Biddinger, R. J. Dutton, P. J.  
Turnbaugh, Diet rapidly and reproducibly alters the human gut microbiome. *Nature*  
(2014), doi:10.1038/nature12820.

37. M. Basan, T. Honda, D. Christodoulou, M. Hörl, Y. F. Chang, E. Leoncini, A. Mukherjee,  
20 H. Okano, B. R. Taylor, J. M. Silverman, C. Sanchez, J. R. Williamson, J. Paulsson, T.  
Hwa, U. Sauer, A universal trade-off between growth and lag in fluctuating environments.  
*Nature* (2020), doi:10.1038/s41586-020-2505-4.

38. B. A. Matenchuk, P. J. Mandhane, A. L. Kozyrskyj, Sleep, circadian rhythm, and gut microbiota. *Sleep Med. Rev.* (2020), , doi:10.1016/j.smr.2020.101340.
39. E. K. Costello, K. Stagaman, L. Dethlefsen, B. J. M. Bohannan, D. A. Relman, The application of ecological theory toward an understanding of the human microbiome. *Science* (80-. ). (2012), , doi:10.1126/science.1224203.
40. P. J. Turnbaugh, R. E. Ley, M. A. Mahowald, V. Magrini, E. R. Mardis, J. I. Gordon, An obesity-associated gut microbiome with increased capacity for energy harvest. *Nature* (2006), doi:10.1038/nature05414.
41. A. Vich Vila, V. Collij, S. Sanna, T. Sinha, F. Imhann, A. R. Bourgonje, Z. Mujagic, D. M. A. E. Jonkers, A. A. M. Masclee, J. Fu, A. Kurilshikov, C. Wijmenga, A. Zhernakova, R. K. Weersma, Impact of commonly used drugs on the composition and metabolic function of the gut microbiota. *Nat. Commun.* (2020), doi:10.1038/s41467-019-14177-z.
42. I. D. Wilson, J. K. Nicholson, Gut microbiome interactions with drug metabolism, efficacy, and toxicity. *Transl. Res.* (2017), , doi:10.1016/j.trsl.2016.08.002.
43. E. F. Wissel, L. K. Smith, Inter-individual variation shapes the human microbiome. *Behav. Brain Sci.* (2019), doi:10.1017/s0140525x1800287x.
44. A. Salonen, L. Lahti, J. Salojärvi, G. Holtrop, K. Korpela, S. H. Duncan, P. Date, F. Farquharson, A. M. Johnstone, G. E. Lobley, P. Louis, H. J. Flint, W. M. De Vos, Impact of diet and individual variation on intestinal microbiota composition and fermentation products in obese men. *ISME J.* (2014), doi:10.1038/ismej.2014.63.
45. A. Kerimi, N. U. Kraut, J. A. da Encarnacao, G. Williamson, The gut microbiome drives inter- and intra-individual differences in metabolism of bioactive small molecules. *Sci.*

*Rep.* (2020), doi:10.1038/s41598-020-76558-5.

46. E. A. Rettedal, H. Gumpert, M. O. A. Sommer, Cultivation-based multiplex phenotyping of human gut microbiota allows targeted recovery of previously uncultured bacteria. *Nat. Commun.* (2014), doi:10.1038/ncomms5714.
- 5 47. J. G. Caporaso, C. L. Lauber, W. A. Walters, D. Berg-Lyons, C. A. Lozupone, P. J. Turnbaugh, N. Fierer, R. Knight, Global patterns of 16S rRNA diversity at a depth of millions of sequences per sample. *Proc. Natl. Acad. Sci. U. S. A.* (2011), doi:10.1073/pnas.1000080107.
48. J. G. Caporaso, C. L. Lauber, W. A. Walters, D. Berg-Lyons, J. Huntley, N. Fierer, S. M. Owens, J. Betley, L. Fraser, M. Bauer, N. Gormley, J. A. Gilbert, G. Smith, R. Knight, Ultra-high-throughput microbial community analysis on the Illumina HiSeq and MiSeq platforms. *ISME J.* (2012), doi:10.1038/ismej.2012.8.
- 10 49. B. J. Callahan, P. J. McMurdie, M. J. Rosen, A. W. Han, A. J. A. Johnson, S. P. Holmes, DADA2: High-resolution sample inference from Illumina amplicon data. *Nat. Methods* (2016), doi:10.1038/nmeth.3869.
- 15 50. J. D. Silverman, H. Durand, R. J. Bloom, S. Mukherjee, L. A. David, Dynamic linear models guide design and analysis of microbiota studies within artificial human guts. *bioRxiv* (2018), doi:10.1101/306597.
51. V. M. Markowitz, I. M. A. Chen, K. Palaniappan, K. Chu, E. Szeto, Y. Grechkin, A. Ratner, B. Jacob, J. Huang, P. Williams, M. Huntemann, I. Anderson, K. Mavromatis, N. N. Ivanova, N. C. Kyrpides, IMG: The integrated microbial genomes database and comparative analysis system. *Nucleic Acids Res.* (2012), doi:10.1093/nar/gkr1044.
- 20 52. B. Bioinformatics, R. L. Tatusov, N. D. Fedorova, J. D. Jackson, A. R. Jacobs, B. Kiryutin, E. V Koonin, D. M. Krylov, R. Mazumder, S. L. Mekhedov, A. N. Nikolskaya,

B. S. Rao, S. Smirnov, A. V Sverdlov, S. Vasudevan, Y. I. Wolf, J. J. Yin, D. A. Natale,  
The COG database: an updated version includes eukaryotes. *BMC Bioinformatics* (2003).

53. H. Ogata, S. Goto, K. Sato, W. Fujibuchi, H. Bono, M. Kanehisa, KEGG: Kyoto  
encyclopedia of genes and genomes. *Nucleic Acids Res.* (1999), , doi:10.1093/nar/27.1.29.

5 54. W. E. C, Enzyme nomenclature 1992. Recommendations of the Nomenclature Committee  
of the International Union of Biochemistry and Molecular Biology on the Nomenclature  
and Classification of Enzymes. *Acad. Press* (1992), doi:10.1111/j.1432-  
1033.1995.tb20774.x.

10 55. E. Enriquez-Hesles, D. L. Smith, N. Maqani, M. B. Wierman, M. D. Sutcliffe, R. D. Fine,  
A. Kalita, S. M. Santos, M. J. Muehlbauer, J. R. Bain, K. A. Janes, J. L. Hartman, M. D.  
Hirschey, J. S. Smith, A cell-nonautonomous mechanism of yeast chronological aging  
regulated by caloric restriction and one-carbon metabolism. *J. Biol. Chem.* (2021),  
doi:10.1074/jbc.ra120.015402.

15 56. T. Kind, G. Wohlgemuth, D. Y. Lee, Y. Lu, M. Palazoglu, S. Shahbaz, O. Fiehn,  
FiehnLib: Mass spectral and retention index libraries for metabolomics based on  
quadrupole and time-of-flight gas chromatography/mass spectrometry. *Anal. Chem.*  
(2009), doi:10.1021/ac9019522.

20 57. A. D. Fernandes, J. M. Macklaim, T. G. Linn, G. Reid, G. B. Gloor, ANOVA-Like  
Differential Expression (ALDEx) Analysis for Mixed Population RNA-Seq. *PLoS One*  
(2013), doi:10.1371/journal.pone.0067019.

58. J. Silverman, K. Roche, Z. C. Holmes, L. A. David, S. Mukherjee, Bayesian multinomial  
logistic normal models through marginally latent matrix-t processes. *arXiv Prepr.* (2019).



**Acknowledgments:** We would like to thank Justin Silverman for assistance with sequencing and model design; Andrew Grover for help sampling from the artificial guts; Verónica Palacios for work on the human research portion of the study; Danielle Anderson and Ken Racicot for providing the snack bars used in the study; Neil Surana for helpful guidance related to our literature review; Tonya Snipes, Lisa Alston-Latta, and Margaret Huggins for keeping our lab spaces and glassware clean; and our study volunteers for their participation.

**Funding:** This work was supported by:

National Institutes of Health grant 1R01DK116187

Office of Naval Research grant N00014-18-1-2616

Translational Research Institute through Cooperative Agreement NNX16AO69A

Damon Runyon Cancer Research Foundation

University of North Carolina CGIBD (NIDDK P30DK034987)

This study used a high-performance computing facility partially supported by grant 2016-IDG-1013 (HARDAC+: Reproducible HPC for Next-Generation Genomics) from the North Carolina Biotechnology Center.

**Author contributions:**

Conceptualization: JL, ZCH, JRB, LAD

Data curation: JL, MJM

Formal analysis: JL

Funding acquisition: LAD

Investigation: JL, ZCH, EPD, HKD, SJ, SKG, ACM, MJM

Software: JL

Visualization: JL

Writing – original draft: JL

Writing – review & editing: JL, LAD

5        **Competing interests:** LAD previously served on the Strategic Advisory Board and held equity in the company Kaleido Biosciences.

**Data and materials availability:** Sequencing data are publicly available via the European Nucleotide Archive with the accession numbers PRJEB45244 (metatranscriptomics) and PRJEB45247 (16S sequencing). Additional data and code are available upon request from  
10        the corresponding author.

## Supplementary Materials

Materials and Methods

Figs. S1 to S10

References (46-58)

15
